# Supplementary material for: Transgenic and Mutation-Based Suppression of a Berberine Bridge Enzyme-Like (BBL) Gene Family Reduces Alkaloid Content in Field-Grown Tobacco
Source: PLoS One. 2015 Feb 17;10(2):e0117273. doi: 10.1371/journal.pone.0117273 (PMC4331498; doi:10.1371/journal.pone.0117273)
Supplement: S1 Table — (XLSX) [file pone.0117273.s002.xlsx]

## Sheet: Sheet1
	Table S1. In silico analysis of BBL gene expression.
	BBL	EST Library	Root-Specific
	Isoform	Hitsa	ESTs
	BBLa	38	38
	BBLb	11	10
	BBLc	16	16
	BBLd	2	1
	a In addition to cDNA from libraries generated solely
	from root tissue, cDNAs isolated from pooled leaf,
	flower, and root cDNA libraries were also included.
